# Supplementary material
Source: MDPI journal article supplement (https://www.mdpi.com/2311-7524/7/5/98)
Supplement: s1 [file s1]

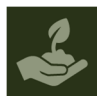**Table S1** Mean and MFV of shoot number (SN), culm heights (CH), and ground diameter (GD) of regenerated lines after 3 years of planting

| Plant label | SN      |       | CH (cm)     |       | GD (mm)   |       | Mean MFV |
|-------------|---------|-------|-------------|-------|-----------|-------|----------|
|             | Mean±SD | MFV   | Mean±SD     | MFV   | Mean±SD   | MFV   |          |
| P 82        | 3.7±0.5 | 0.576 | 697.3±87.2  | 1.000 | 61.9±6.8  | 1.000 | 0.859    |
| P 84        | 2.5±1.5 | 0.364 | 420.3±100.1 | 0.614 | 40.5±12.8 | 0.571 | 0.516    |
| P 38        | 4.7±0.9 | 0.758 | 269.7±16.2  | 0.416 | 29.5±5.5  | 0.338 | 0.504    |
| P 34        | 5.0±0.0 | 0.818 | 260.0±39.6  | 0.304 | 23.4±5.8  | 0.322 | 0.482    |
| P 3         | 3.0±1.0 | 0.455 | 379.7±9.9   | 0.445 | 31.2±0.8  | 0.508 | 0.469    |
| P 20        | 1.0±0.1 | 0.091 | 459.7±106.7 | 0.681 | 44.2±6.3  | 0.633 | 0.468    |
| P 18        | 3.3±1.9 | 0.515 | 314.7±18.4  | 0.458 | 31.9±1.9  | 0.408 | 0.460    |
| P 109       | 2.5±0.5 | 0.364 | 335.3±34.5  | 0.563 | 37.7±4.0  | 0.439 | 0.455    |
| P 37        | 3.0±1.6 | 0.455 | 330.3±36.3  | 0.477 | 32.9±5.6  | 0.431 | 0.454    |
| P 116       | 1.0±0.2 | 0.091 | 450.0±39.8  | 0.652 | 42.6±4.6  | 0.617 | 0.453    |
| P 22        | 1.0±0.1 | 0.091 | 375.0±144.7 | 0.762 | 48.7±20.1 | 0.501 | 0.451    |
| P 40        | 3.7±0.5 | 0.576 | 264.7±44.1  | 0.429 | 30.3±6.1  | 0.330 | 0.445    |
| P 45        | 2.3±0.9 | 0.333 | 368.7±121.2 | 0.493 | 33.8±9.8  | 0.490 | 0.439    |
| P 33        | 1.7±0.5 | 0.212 | 378.0±70.4  | 0.586 | 39.0±5.8  | 0.506 | 0.435    |
| P 16        | 1.0±0.1 | 0.091 | 403.0±73.4  | 0.640 | 41.9±6.8  | 0.543 | 0.425    |
| P 56        | 4.5±0.5 | 0.727 | 235.3±14.8  | 0.229 | 19.2±3.0  | 0.283 | 0.413    |
| P 14        | 1.5±0.5 | 0.182 | 329.7±10.2  | 0.618 | 40.8±0.9  | 0.431 | 0.410    |
| P 69        | 4.0±0.0 | 0.636 | 225.0±54.9  | 0.308 | 23.6±9.6  | 0.268 | 0.404    |
| P 28        | 3.0±0.0 | 0.455 | 310.3±121.6 | 0.352 | 26.0±6.5  | 0.400 | 0.402    |
| P 94        | 2.5±0.5 | 0.364 | 275.3±5.2   | 0.495 | 33.9±1.4  | 0.345 | 0.401    |
| P 27        | 2.5±0.5 | 0.364 | 235.3±15.0  | 0.531 | 35.9±0.4  | 0.283 | 0.393    |
| P 72        | 3.7±1.2 | 0.576 | 243.3±82.0  | 0.294 | 22.8±3.1  | 0.296 | 0.389    |
| P 12        | 4.0±0.0 | 0.636 | 255.0±25.1  | 0.209 | 18.1±4.1  | 0.314 | 0.387    |
| P 99        | 4.0±1.4 | 0.636 | 229.7±19.8  | 0.215 | 18.4±2.3  | 0.276 | 0.376    |
| P 36        | 2.3±0.5 | 0.333 | 262.0±11.9  | 0.454 | 31.7±3.3  | 0.325 | 0.371    |
| P 86        | 6.0±2.0 | 1.000 | 107.7±48.3  | 0.022 | 7.7±2.8   | 0.085 | 0.369    |
| P 107       | 2.0±0.8 | 0.273 | 295.0±75.2  | 0.458 | 31.9±10.6 | 0.376 | 0.369    |
| P 46        | 2.3±1.2 | 0.333 | 259.0±10.2  | 0.450 | 31.5±1.7  | 0.320 | 0.368    |
| P 75        | 2.5±0.5 | 0.364 | 290.3±39.6  | 0.371 | 27.0±3.1  | 0.369 | 0.368    |
| P 115       | 2.5±0.5 | 0.364 | 244.7±15.1  | 0.426 | 30.1±3.7  | 0.299 | 0.363    |
| P 119       | 1.5±0.5 | 0.182 | 285.0±55.1  | 0.545 | 36.7±3.9  | 0.361 | 0.363    |
| P 120       | 5.5±1.5 | 0.909 | 130.3±30.2  | 0.030 | 8.2±0.8   | 0.120 | 0.353    |
| P 108       | 2.5±0.5 | 0.364 | 299.7±39.9  | 0.302 | 23.3±7.5  | 0.384 | 0.350    |
| P 39        | 2.0±0.1 | 0.273 | 296.7±45.4  | 0.393 | 28.3±4.7  | 0.379 | 0.348    |
| P 104       | 3.5±0.5 | 0.545 | 219.7±40.2  | 0.237 | 19.6±5.9  | 0.260 | 0.347    |
| P 25        | 3.5±0.5 | 0.545 | 235.0±15.3  | 0.210 | 18.1±1.7  | 0.283 | 0.346    |
| P 63        | 1.5±0.5 | 0.182 | 325.3±55.3  | 0.431 | 30.4±4.6  | 0.423 | 0.345    |
| P 6         | 2.0±0.1 | 0.273 | 269.7±10.3  | 0.420 | 29.8±1.1  | 0.338 | 0.343    |
| P 95        | 1.5±0.5 | 0.182 | 310.3±10.1  | 0.448 | 31.3±1.7  | 0.400 | 0.343    |
| P 118       | 1.0±0.1 | 0.091 | 355.3±24.5  | 0.466 | 32.3±0.5  | 0.470 | 0.342    |
| P 32        | 5.3±1.2 | 0.879 | 98.0±28.5   | 0.052 | 9.4±1.6   | 0.071 | 0.334    |
| P 42        | 1.5±0.1 | 0.182 | 325.3±65.0  | 0.395 | 28.4±0.1  | 0.423 | 0.333    |
| P 31        | 4.5±0.5 | 0.727 | 140.3±9.7   | 0.122 | 13.3±4.1  | 0.136 | 0.328    |
| P 87        | 4.0±0.0 | 0.636 | 173.3±24.3  | 0.159 | 15.3±5.5  | 0.188 | 0.328    |
| P 24        | 2.5±0.5 | 0.364 | 230.3±10.4  | 0.329 | 24.7±2.5  | 0.276 | 0.323    |
| P 60        | 3.0±1.0 | 0.455 | 210.0±9.9   | 0.270 | 21.5±2.2  | 0.245 | 0.323    |
| P 10        | 2.0±0.2 | 0.273 | 290.0±60.4  | 0.321 | 24.3±2.4  | 0.369 | 0.321    |
| P 50        | 2.0±0.1 | 0.273 | 249.7±9.5   | 0.385 | 27.8±1.1  | 0.307 | 0.321    |
| P 23        | 2.0±0.5 | 0.273 | 270.3±10.4  | 0.331 | 24.9±1.3  | 0.338 | 0.314    |
| P 67        | 3.5±0.5 | 0.545 | 205.0±85.3  | 0.134 | 13.9±3.2  | 0.237 | 0.305    |
| P 101       | 2.5±0.5 | 0.364 | 215.3±45.4  | 0.298 | 23.0±0.8  | 0.252 | 0.305    |
| P 110       | 2.5±1.5 | 0.364 | 224.7±75.4  | 0.283 | 22.2±6.4  | 0.268 | 0.305    |

|       |         |       |            |       |           |       |       |
|-------|---------|-------|------------|-------|-----------|-------|-------|
| P 4   | 3.5±0.5 | 0.545 | 160.3±20.2 | 0.181 | 16.5±3.3  | 0.167 | 0.298 |
| P 26  | 2.5±1.5 | 0.364 | 225.0±5.1  | 0.253 | 20.5±1.8  | 0.268 | 0.295 |
| P 59  | 1.0±0.1 | 0.091 | 295.0±25.4 | 0.412 | 29.3±5.2  | 0.376 | 0.293 |
| P 97  | 2.0±0.2 | 0.273 | 210.0±29.8 | 0.356 | 26.2±4.2  | 0.245 | 0.291 |
| P 91  | 1.5±0.1 | 0.182 | 248.0±12.6 | 0.385 | 27.8±0.9  | 0.303 | 0.290 |
| P 53  | 3.3±0.9 | 0.515 | 147.3±38.7 | 0.185 | 16.7±3.2  | 0.146 | 0.282 |
| P 13  | 3.0±1.0 | 0.455 | 174.7±5.0  | 0.195 | 17.3±2.6  | 0.190 | 0.280 |
| P 90  | 3.5±0.5 | 0.545 | 130.0±40.1 | 0.163 | 15.5±4.2  | 0.120 | 0.276 |
| P 41  | 2.5±0.5 | 0.364 | 220.3±45.2 | 0.200 | 17.6±5.6  | 0.260 | 0.275 |
| P 15  | 3.5±0.5 | 0.545 | 155.0±25.3 | 0.116 | 12.9±3.7  | 0.159 | 0.274 |
| P 88  | 1.0±0.1 | 0.091 | 270.3±80.2 | 0.390 | 28.1±10.1 | 0.338 | 0.273 |
| P 30  | 2.0±0.1 | 0.273 | 220.3±64.4 | 0.275 | 21.8±7.3  | 0.260 | 0.269 |
| P 57  | 2.3±1.2 | 0.333 | 183.3±59.6 | 0.257 | 20.7±6.8  | 0.203 | 0.264 |
| P 21  | 2.5±1.9 | 0.364 | 177.7±3.1  | 0.225 | 19.0±0.7  | 0.194 | 0.261 |
| P 78  | 2.0±0.1 | 0.273 | 215.3±45.3 | 0.257 | 20.8±1.4  | 0.252 | 0.261 |
| P 1   | 1.5±0.1 | 0.182 | 220.0±20.2 | 0.319 | 24.2±2.4  | 0.260 | 0.253 |
| P 106 | 1.5±0.1 | 0.182 | 229.7±65.1 | 0.292 | 22.7±7.5  | 0.276 | 0.250 |
| P 49  | 3.5±2.5 | 0.545 | 129.7±10.4 | 0.076 | 10.7±4.2  | 0.120 | 0.247 |
| P 96  | 1.0±0.1 | 0.091 | 215.3±25.1 | 0.397 | 28.5±1.8  | 0.252 | 0.247 |
| P 112 | 1.5±0.1 | 0.182 | 190.0±10.1 | 0.298 | 23.0±2.8  | 0.213 | 0.231 |
| P 55  | 1.0±0.1 | 0.091 | 170.3±70.2 | 0.417 | 29.6±2.3  | 0.182 | 0.230 |
| P 85  | 2.5±1.0 | 0.364 | 170.3±10.2 | 0.137 | 14.1±1.8  | 0.182 | 0.228 |
| P 5   | 1.5±0.1 | 0.182 | 189.7±30.3 | 0.234 | 19.5±6.3  | 0.213 | 0.210 |
| P 29  | 1.3±0.1 | 0.152 | 220.3±40.2 | 0.218 | 18.6±7.0  | 0.260 | 0.210 |
| P 89  | 2.5±1.5 | 0.364 | 145.0±20.0 | 0.105 | 12.3±4.4  | 0.144 | 0.204 |
| P 111 | 1.0±0.1 | 0.091 | 195.0±45.1 | 0.299 | 23.0±2.0  | 0.221 | 0.204 |
| P 64  | 1.5±0.1 | 0.182 | 170.0±20.2 | 0.239 | 19.7±3.8  | 0.182 | 0.201 |
| P 47  | 1.5±0.1 | 0.182 | 185.3±5.1  | 0.213 | 18.3±0.4  | 0.206 | 0.200 |
| P 76  | 2.0±0.1 | 0.273 | 172.7±20.7 | 0.127 | 13.5±0.6  | 0.188 | 0.196 |
| P 58  | 2.5±0.5 | 0.364 | 140.3±9.9  | 0.080 | 10.9±1.0  | 0.136 | 0.193 |
| P 35  | 1.5±0.1 | 0.182 | 180.3±9.7  | 0.195 | 17.3±3.3  | 0.198 | 0.192 |
| P 62  | 2.0±0.1 | 0.273 | 160.3±22.3 | 0.137 | 14.1±1.3  | 0.167 | 0.192 |
| P 74  | 2.0±0.2 | 0.273 | 158.0±12.1 | 0.113 | 12.8±0.3  | 0.164 | 0.183 |
| P 19  | 2.0±0.2 | 0.273 | 139.7±10.2 | 0.132 | 13.8±2.5  | 0.136 | 0.180 |
| P 80  | 1.0±1.0 | 0.091 | 178.0±47.5 | 0.221 | 18.8±3.1  | 0.194 | 0.169 |
| P 79  | 1.0±0.1 | 0.091 | 190.3±70.4 | 0.179 | 16.4±6.5  | 0.213 | 0.161 |
| P 2   | 1.5±0.1 | 0.182 | 140.3±14.9 | 0.146 | 14.6±4.4  | 0.136 | 0.155 |
| P 43  | 0.5±0.5 | 0.000 | 220.3±59.5 | 0.190 | 17.0±4.8  | 0.260 | 0.150 |
| P 117 | 1.0±0.1 | 0.091 | 145.3±20.4 | 0.134 | 13.9±1.9  | 0.144 | 0.123 |
| P 17  | 0.5±0.5 | 0.000 | 159.7±10.3 | 0.185 | 16.8±1.5  | 0.167 | 0.117 |
| P 51  | 1.5±0.1 | 0.182 | 100.3±20.4 | 0.080 | 10.9±1.0  | 0.074 | 0.112 |
| P 7   | 1.0±0.1 | 0.091 | 53.3±3.2   | 0.000 | 6.5±1.2   | 0.000 | 0.030 |

Note: Mean±Standard Deviation (SD) (n=3), membership function value (MFV) was described in 2.7 Data statistics and analysis
